# Supplementary material for: Visual detection of serum asialohaptoglobin by plasmonic sandwich ELLSA – a new platform for cirrhosis diagnosis
Source: Royal Society of Chemistry journal article supplement (doi:10.1039/c5an02000j), 2015-11-03
Supplement: c5an02000j1.pdf [file c5an02000j1.pdf]

## Electronic Supplementary Information

### **Visual detection of serum asialohaptoglobin by plasmonic sandwich ELLSA- a new platform for cirrhosis diagnosis**

Partha Pratim Bose,<sup>#</sup> Gautam Mandal, Dharmendra Kumar, Ajay Duseja, and Bishnu Pada Chatterjee

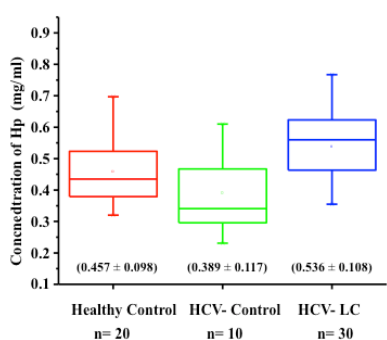

**Figure S1.** Serum Hp levels among HCV-LC patients and controls. Each horizontal line indicates the mean value of Hp in different groups. Data is presented as mean  $\pm$  SD.

**A)**

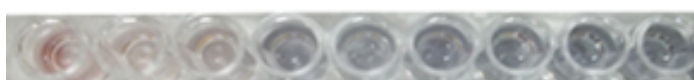

**B)**

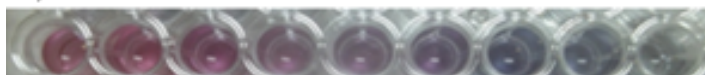

**Figure S11.** Optimization of tonality change with different amounts of gold (III): A) 0.4 mM and B) 0.2 mM respectively and H<sub>2</sub>O<sub>2</sub>: 30, 60, 90, 120, 150, 180, 210, 240, 270  $\mu$ M (right to left well) in A and B respectively.
